# Supplementary material
Source: HighWire-hosted journal article supplement (https://jech.bmj.com/highwire/filestream/159984/field_highwire_adjunct_files/1/Preface.pdf)
Supplement: Preface.pdf [file Preface.pdf]

JOURNAL OF  
**EPIDEMIOLOGY**  
& *Community Health*

---

The Society for Social Medicine  
47th Annual Scientific Meeting  
Edinburgh  
17–19 September 2003

---

***Contents***

- i Basic programme
- ii Timetable
- A1 Abstracts

# The Society for Social Medicine

## 47th Annual Scientific Meeting:

### 17–19 September 2003

## Programme

---

### Wednesday 17 September

- 12.00–17.30 **Registration** (William Robertson Building Foyer)
- 12.00–13.40 **Lunch** (Teviot Row House)
- 13.45–14.00 **Welcome** (David Hume Tower – Theatre A)
- 14.00–15.15 **Plenary Session**  
 DA Lawlor *et al.* *Temperature around the time of birth and coronary heart disease: findings from the British Women's Heart and Health Study* (abstract on page A1)  
 S Christie *et al.* *Road traffic crashes at mobile speed camera sites: a controlled before and after study* (abstract on page A1)  
 TM Farragher & P Warner. *Implications of current data protection legislation for population health research: a case study* (abstract on page A1)
- 15.15–15.40 **Tea & Coffee** (William Robertson Building Foyer and David Hume Tower Basement)
- 15.45–16.45 **Cochrane Lecture** (David Hume Tower – Theatre A)  
 Professor Mildred Blaxter, University of East Anglia. *Fish in water: social capital and the qualitative researcher*
- 17.00–17.30 Buses to Pollock Halls
- 17.00–18.00 **AGM** (David Hume Tower – Theatre A)
- 17.30–18.30 Welcome meeting (Nelson Room, Pollock Halls)
- 18.00 Buses to Pollock Halls
- 19.00–19.30 Buses to Playfair Library
- 19.30–21.30 **Reception and finger buffet** (Playfair Library)  
 Welcome by Malcolm Chisholm MSP, Minister for Health and Community Care
- 21.00–21.30 Buses back to Pollock Halls
- 21.30–00.00 **Ceilidh** (Holland House South Hall)

#### OR

- 17.30–19.00 **Dinner in Halls** (John McIntyre Centre)
- 19.30–23.00 **Quiet Bar** (John McIntyre Centre)

### Thursday 18 September

- 07.30–09.00 **Breakfast** (John McIntyre Centre)
- 08.30–09.00 Buses to George Square
- 08.30–17.00 **Registration/Information desk** (William Robertson Building Foyer)
- 09.00–09.30 **Invited speaker** Samuel Ochieng, Consumer Information Network, Kenya, *The right to health: the role of health workers* (David Hume Tower – Theatre A)
- 09.35–10.50 **5 Parallel Sessions** (4 papers per session) (William Robertson Building and David Hume Tower)

- 10.55–11.30 **Tea & Coffee with Poster viewing** (William Robertson Building Foyer and David Hume Tower Basement)
- 11.35–12.50 **5 Parallel Sessions** (4 papers per session) (William Robertson Building and David Hume Tower)
- 13.00–14.00 **Lunch** (Teviot Row House) Packed lunches for hill walk available for collection at registration/information desk
- 14.10–17.00 **Workshops**
- OR**
- 13.30 Buses to Flotterstone for hill walk
- 14.00–17.00 **Visits**
- 19.00–19.30 Buses to Our Dynamic Earth
- 19.30–23.00 **Annual SSM Dinner** (Our Dynamic Earth)
- 22.30–23.00 Buses back to Pollock Halls
- 23.00–01.00 **Disco** (Holland House South Hall)
- OR**
- 17.30–19.00 **Dinner in Halls** (John McIntyre Centre)
- 19.30–23.00 **Quiet Bar** (John McIntyre Centre)

### Friday 19 September

- 07.30–09.00 **Breakfast** (John McIntyre Centre)
- 08.30–09.00 Buses to George Square
- 08.30–12.00 **Registration/Information desk** (William Robertson Building Foyer)
- 09.00–10.35 **5 Parallel Sessions** (5 papers per session) (William Robertson Building and David Hume Tower)
- 10.35–11.00 **Tea & Coffee with Poster viewing** (William Robertson Building Foyer and David Hume Tower Basement)
- 11.05–12.20 **Plenary Session** (David Hume Tower – Theatre A)  
 PM Brindle *et al.* *Coronary risk assessment: Framingham-based methods overestimate risk in British men* (abstract on page A2)  
 SA Bremner *et al.* *Does DTP, MMR, or BCG vaccination in early life influence the risk of hay fever?* (abstract on page A2)  
 M Petticrew & G Davey Smith. *Monkey business: what do primate studies of social hierarchies, stress, and the development of CHD tell us about humans?* (abstract on page A2)
- 12.20–12.50 **Invited speaker** Peter Drahos, The Australian National University. *Social medicine and private property rights in information: problems of access* (David Hume Tower – Theatre A)
- 12.50 **Close of Conference**

**Concurrent scientific sessions (abstract page numbers are shown in brackets)**  
**Thursday 18th September**

| Session 1 (William Robertson Building, Seminar Room 11)<br><b>HSR I</b>                                                                                                                                                                        | Session 2 (William Robertson Building, Seminar Room G01)<br><b>Inequality I</b>                                                                                                                                                                                                      | Session 3 (William Robertson Building, Seminar Room G02)<br><b>CHD and stroke care</b>                                                                                                                                        | Session 4 (David Hume Tower, DHT North)<br><b>Policy and decision making</b>                                                                                        | Session 5 (David Hume Tower, DHT South)<br><b>Early life</b>                                                                                                                                 |
|------------------------------------------------------------------------------------------------------------------------------------------------------------------------------------------------------------------------------------------------|--------------------------------------------------------------------------------------------------------------------------------------------------------------------------------------------------------------------------------------------------------------------------------------|-------------------------------------------------------------------------------------------------------------------------------------------------------------------------------------------------------------------------------|---------------------------------------------------------------------------------------------------------------------------------------------------------------------|----------------------------------------------------------------------------------------------------------------------------------------------------------------------------------------------|
| 09.35–09.50<br><i>Factors influencing time to treatment for patients with breast or colorectal cancer</i><br>R Robertson <i>et al</i> (A2)                                                                                                     | 09.35–09.50<br><i>Revisiting the health selection hypothesis using structural equation models</i><br>T Chandola <i>et al</i> (A4)                                                                                                                                                    | 09.35–09.50<br><i>Reductions in cardiac mortality with exercise based cardiac rehabilitation: how much can be attributed to improvements in cardiovascular risk factors?</i><br>R S Taylor <i>et al</i> (A5)                  | 09.35–09.50<br><i>Will the privatisation of NHS provision undermine the principles of the NHS?</i><br>A Talbot Smith & AM Pollock (A6)                              | 09.35–09.50<br><i>Does breastfeeding in infancy lower blood pressure in childhood? The Avon Longitudinal Study of Parents and Children</i><br>R Martin <i>et al</i> (A7)                     |
| 09.55–10.10<br><i>Barriers to the uptake of cataract surgical services in Bangladesh</i><br>BP Dineen <i>et al</i> (A3)                                                                                                                        | 09.55–10.10<br><i>Evidence for the contribution of migration, social deprivation, and life course processes to the rise and fall of CHD in mid 20<sup>th</sup> century USA</i><br>C Kelleher <i>et al</i> (A4)                                                                       | 09.55–10.10<br><i>A systematic review of multi-disciplinary interventions in heart failure</i><br>J Battersby <i>et al</i> (A5)                                                                                               | 09.55–10.10<br><i>Guideline dissemination and implementation strategies: a systematic review of effectiveness and efficiency</i><br>RE Thomas <i>et al</i> (A6)     | 09.55–10.10<br><i>Do modifiable factors in the early home and school environment affect cognitive development differently according to birth weight?</i><br>BJMH1 Jefferis <i>et al</i> (A7) |
| 10.15–10.30<br><i>Effectiveness of influenza vaccine against respiratory hospitalisations and deaths in 65 year olds and older: a cohort study using the United Kingdom General Practice Research Database</i><br>P Mangtani <i>et al</i> (A3) | 10.15–10.30<br><i>Temporal, geographical, and social differences in the incidence of 30 common childhood conditions presenting in primary care</i><br>IM Carey <i>et al</i> (A4)                                                                                                     | 10.15–10.30<br><i>A Family Support Organiser for stroke patients and their carers: intervention design and results of a randomised controlled trial</i><br>K Tilling <i>et al</i> (A5)                                        | 10.15–10.30<br><i>Estimation of implied rates of discounting in health care decision making</i><br>RR West <i>et al</i> (A6)                                        | 10.15–10.30<br><i>Birth weight in offspring and cancer mortality in parents</i><br>UB Fallon <i>et al</i> (A8)                                                                               |
| 10.35–10.50<br><i>Unmentionable maladies: what are the consequences for self care and social support?</i><br>M Santer <i>et al</i> (A3)                                                                                                        | 10.35–10.50<br><i>Ethnic differences in overweight and obese children and young adults in England</i><br>S Saxena <i>et al</i> (A4)                                                                                                                                                  | 10.35–10.50<br><i>Factors that may contribute to inequity in stroke care: a qualitative study</i><br>F Mold <i>et al</i> (A6)                                                                                                 | 10.35–10.50<br><i>Quality of care for elderly adults in nursing homes and in the community: a controlled observational study</i><br>AA Montgomery <i>et al</i> (A7) | 10.35–10.50<br><i>Association between sibling number and allergic diseases in the Glasgow Students Cohort</i><br>S Kinra <i>et al</i> (A8)                                                   |
| <b>TEA AND COFFEE</b>                                                                                                                                                                                                                          | <b>TEA AND COFFEE</b>                                                                                                                                                                                                                                                                | <b>TEA AND COFFEE</b>                                                                                                                                                                                                         | <b>TEA AND COFFEE</b>                                                                                                                                               | <b>TEA AND COFFEE</b>                                                                                                                                                                        |
| <b>CHD and diabetes</b>                                                                                                                                                                                                                        | <b>Methods I</b>                                                                                                                                                                                                                                                                     | <b>General practice</b>                                                                                                                                                                                                       | <b>Women's health</b>                                                                                                                                               | <b>Economic evaluation</b>                                                                                                                                                                   |
| 11.35–11.50<br><i>Helicobacter pylori infection and CHD in the community</i><br>JA Lane <i>et al</i> (A8)                                                                                                                                      | 11.35–11.50<br><i>Investigating participation bias in case-control studies</i><br>GR Law <i>et al</i> (A9)                                                                                                                                                                           | 11.35–11.50<br><i>Antibiotic prescribing and resistance: what is the added value of person specific data about antibiotic prescribing compared with existing, practice level information?</i><br>PT Donnan <i>et al</i> (A11) | 11.35–11.50<br><i>Women's preferences for accessing emergency contraception: an in depth interview study</i><br>R Locke <i>et al</i> (A12)                          | 11.35–11.50<br><i>The health impact of state subsidised economic development: a systematic review</i><br>M Egan <i>et al</i> (A13)                                                           |
| 11.55–12.10<br><i>Is the association between parity and CHD due to biological effects of pregnancy or adverse lifestyle risk factors associated with childrearing?</i><br>S Ebrahim <i>et al</i> (A9)                                          | 11.55–12.10<br><i>Single patient trials: exploring patients' perspectives using quantitative and qualitative methods</i><br>ST Brookes <i>et al</i> (A10)                                                                                                                            | 11.55–12.10<br><i>Turning electronic patient data into strategic knowledge in general practice—the HYPER trial</i><br>E Mitchell <i>et al</i> (A11)                                                                           | 11.55–12.10<br><i>Early life influences on age at menopause</i><br>R Hardy & D Kuh (A12)                                                                            | 11.55–12.10<br><i>Is provision and funding of cardiac rehabilitation appropriate for the achievement of National Service Framework goals?</i><br>I Griebsch <i>et al</i> (A13)               |
| 12.15–12.30<br><i>Has the impact of passive smoking on CHD risk been underestimated? – evidence from the British Regional Heart Study</i><br>PH Whincup <i>et al</i> (A9)                                                                      | 12.15–12.30<br><i>Involving "hard to reach" families in research – a qualitative study exploring the views of women who choose not to participate in a randomised controlled trial of a Home Visiting Service for "vulnerable" expectant women</i><br>S Kirkpatrick & J Barlow (A10) | 12.15–12.30<br><i>GPs' confidence in breast cancer genetics: evaluation of a passive computerised decision support intervention</i><br>N Torrance <i>et al</i> (A11)                                                          | 12.15–12.30<br><i>Expected and unexpected complications of hysterectomy</i><br>A Herbert <i>et al</i> (A12)                                                         | 12.15–12.30<br><i>Economic evaluation of chest pain unit versus routine care</i><br>S Goodacre <i>et al</i> (A14)                                                                            |
| 12.35–12.50<br><i>Weight loss and subsequent diabetes status in obesity</i><br>L Aucott <i>et al</i> (A9)                                                                                                                                      | 12.35–12.50<br><i>Using community researchers in the evaluation of the healthy living approach to community development in Pembrokeshire</i><br>A Evans <i>et al</i> (A10)                                                                                                           | 12.35–12.50<br><i>People's understanding of information about inherited risk: experiences of screening for familial hyperlipidaemia</i><br>D Marks <i>et al</i> (A11)                                                         | 12.35–12.50<br><i>Post-mastectomy pain syndrome: longitudinal follow up of breast cancer survivors</i><br>L McEvoy <i>et al</i> (A13)                               | 12.35–12.50<br><i>Economic analysis of treatments contributing to the recent coronary heart disease mortality decline in England and Wales</i><br>D Fidan <i>et al</i> (A14)                 |

| Concurrent scientific sessions (abstract page numbers are shown in brackets)<br>Friday 19th September                                                                   |                                                                                                                                                                                                                                             |                                                                                                                                                                     |                                                                                                                                                                                                                                 |                                                                                                                                                                          |
|-------------------------------------------------------------------------------------------------------------------------------------------------------------------------|---------------------------------------------------------------------------------------------------------------------------------------------------------------------------------------------------------------------------------------------|---------------------------------------------------------------------------------------------------------------------------------------------------------------------|---------------------------------------------------------------------------------------------------------------------------------------------------------------------------------------------------------------------------------|--------------------------------------------------------------------------------------------------------------------------------------------------------------------------|
| Session 1 (William Robertson Building, Seminar Room 11)<br><b>Behavioural research</b>                                                                                  | Session 2 (William Robertson Building, Seminar Room G01)<br><b>Methods II</b>                                                                                                                                                               | Session 3 (William Robertson Building, Seminar Room G02)<br><b>HSR II</b>                                                                                           | Session 4 (David Hume Tower, DHT North)<br><b>Mental health</b>                                                                                                                                                                 | Session 5 (David Hume Tower, DHT South)<br><b>Inequality II</b>                                                                                                          |
| 09.00–09.15<br><i>Promoting walking and cycling as an alternative to using cars: what works? A systematic review</i><br>D Ogilvie <i>et al</i> (A14)                    | 09.00–09.15<br><i>Analysis of change with respect to baseline is erroneous using standard correlation/regression: do we realise how many studies are statistically invalid due to mathematical coupling?</i><br>A Blance <i>et al</i> (A15) | 09.00–09.15<br><i>Routine examination of the newborn: the EMREN trial (an RCT evaluation of the extension of the midwife role)</i><br>J Townsend <i>et al</i> (A17) | 09.00–09.15<br><i>Meta-analysis of the efficacy and tolerability of selective serotonin reuptake inhibitors compared with tricyclic antidepressants in primary care treated depression</i><br>S MacGillivray <i>et al</i> (A19) | 09.00–09.15<br><i>Explaining spatial variation in access to coronary revascularisation</i><br>AM Crook <i>et al</i> (A20)                                                |
| 09.20–09.35<br><i>Are children eating more “healthily” as they get older?</i><br>L Glynn <i>et al</i> (A14)                                                             | 09.20–09.35<br><i>Inappropriate and indeterminate use of the odds ratio: prevalence in four major general journals</i><br>K Steel <i>et al</i> (A16)                                                                                        | 09.20–09.35<br><i>A review of trials of complex health care interventions</i><br>E Sanford <i>et al</i> (A17)                                                       | 09.20–09.35<br><i>Should we screen for depression and anxiety? A systematic review</i><br>SM Gilbody <i>et al</i> (A19)                                                                                                         | 09.20–09.35<br><i>Evidence for a sex, age, and social variation in prescribing cardiovascular therapies to the elderly in primary care</i><br>C Usher <i>et al</i> (A20) |
| 09.40–09.55<br><i>“You can’t go without a fag, you need it for your hash”–smoking cannabis, and young people</i><br>A Amos <i>et al</i> (A15)                           | 09.40–09.55<br><i>Electronic literature searching for systematic review of qualitative literature</i><br>RL Shaw <i>et al</i> (A16)                                                                                                         | 09.40–09.55<br><i>Teamwork and safety attitudes among staff in critical care units and the relationship to patient mortality</i><br>K Rowan <i>et al</i> (A18)      | 09.40–09.55<br><i>Sex differences in mental health of surviving partner following the death of spouse</i><br>D Boniface & J Thomson (A19)                                                                                       | 09.40–09.55<br><i>Urban/rural inequalities in ischaemic heart disease and their association with deprivation</i><br>KA Levin (A21)                                       |
| 10.00–10.15<br><i>Recent trends in sexual risk behaviour among gay men in London</i><br>JP Dodds <i>et al</i> (A15)                                                     | 10.00–10.15<br><i>In the eyes of the beholder: the social construction of gender in public health</i><br>C Mae & J Coreil (A16)                                                                                                             | 10.00–10.15<br><i>Consensus methods to develop guidelines for routine preoperative testing. Limitations of the method</i><br>J Langham <i>et al</i> (A18)           | 10.00–10.15<br><i>Socioeconomic change and suicide: a time series study of Ireland</i><br>I Perry <i>et al</i> (A19)                                                                                                            | 10.00–10.15<br><i>Private and NHS referrals from general practice; their relationship with each other and with deprivation</i><br>A Wilson <i>et al</i> (A21)            |
| 10.20–10.35<br><i>Conducting behavioural research using the internet: a comparison of online and offline samples of gay/bisexual men</i><br>J Elford <i>et al</i> (A15) | 10.20–10.35<br><i>Detecting similarities in the spatial distribution of childhood leukaemia and type I diabetes in Yorkshire using Bayesian smoothing</i><br>SOM Manda <i>et al</i> (A17)                                                   | 10.20–10.35<br><i>Does hospital organisational culture influence hospital performance?</i><br>HTO Davies <i>et al</i> (A18)                                         | 10.20–10.35<br><i>War trauma, physical, and psychological injury–coping strategies and prospects for rehabilitation among Lebanese and Palestinian populations</i><br>A Sibai <i>et al</i> (A20)                                | 10.20–10.35<br><i>Inequality and inequity: a case study, with reflection of potential interventions</i><br>P Warner <i>et al</i> (A21)                                   |
